# Supplementary material for: Systemic translocation of Staphylococcus drives autoantibody production in HIV disease
Source: PubMed Central journal article supplement (PMC6376754; doi:10.1186/s40168-019-0646-1), 2019-02-14
Supplement: 40168_2019_646_MOESM1_ESM.pdf [file 40168_2019_646_MOESM1_ESM.pdf]

## Supplementary Tables

|                   | HIV-<br>(n = 16) | HIV+/low ANA<br>(n = 14) | HIV+/high ANA<br>(n = 12) | P value (two<br>HIV+ groups) |
|-------------------|------------------|--------------------------|---------------------------|------------------------------|
| Age               | 38 (33-55)       | 43 (26-52)               | 43 (36-54)                | 0.41                         |
| Sex (male/female) | 5/11 (31.3%)     | 10/4 (71.4%)             | 7/5 (58.3%)               | 0.68                         |
| CD4 counts        | 710 (429-936)    | 572 (476-800)            | 566 (442-798)             | 0.91                         |
| Nadir CD4 counts  |                  | 348 (211-469)            | 258 (189-469)             | 0.70                         |
| Duration of ART   |                  | 5 (4-6)                  | 5 (3-6)                   | 0.79                         |
| %annexin V+ CD4   | 19 (13-40)       | 30 (19-33)               | 32 (21.5-43)              | 0.69                         |
| %CD38+ mCD4       | 14.3 (10.1-16.8) | 20.1 (16.1-27.8)         | 11.8 (4.6-20.7)           | 0.05                         |
| %ki67+ CD4        | 1.1 (0.7-1.8)    | 2.4 (1.7-4.2)            | 2.5 (1.9-3.2)             | 0.97                         |
| B cell counts     | 176 (74-221)     | 146 (110-185)            | 245 (113-321)             | 0.04                         |
| %annexin V+ B     | 11.6 (6.5-16.6)  | 14 (12.7-21.4)           | 30.1 (19.5-39.8)          | 0.003                        |
| %ki67+ B          | 0.9 (0.8-1.5)    | 1.6 (0.9-2.8)            | 1.2 (0.9-1.8)             | 0.38                         |

**Table S1.** Clinical characteristics and baseline immune parameters

Data are medians (interquartile ranges)

P value: comparisons of P value between the two HIV+ groups on D0

| Sequence ID | V-GENE                        | J-GENE                    | D-GENE          | CDR3-Sequence          | Mutation numbers | %Mutation rate | mAb reactive with Ag |             |            |
|-------------|-------------------------------|---------------------------|-----------------|------------------------|------------------|----------------|----------------------|-------------|------------|
|             |                               |                           |                 |                        |                  |                | dsDNA                | flu vaccine | Nuclear Ag |
| VH-134-Ab   | IGHV4-30-4*01 F               | IGHJ4*02 F                | IGHD3-22*01 F   | AEQPYYYDTSALN          | 21               | 7.14           | +                    | -           | NA         |
| VH-178-Ab   | IGHV3-30*03 F, or IGHV3-30*18 | IGHJ4*02 F                | IGHD4-23*01 ORF | AGGNDYGDHSPLDY         | 7                | 2.41           | + +                  | -           | NA         |
| VH-156-Ab   | IGHV3-30*03 F, or IGHV3-30*18 | IGHJ1*01 F                | IGHD6-13*01 F   | AKDLGIAAAVAQD          | 12               | 4.05           | +                    | -           | NA         |
| VH-169-Ab   | IGHV3-23*01 F, or IGHV3-23D*0 | IGHJ4*02 F                | IGHD3-22*01 F   | AKDLLSGYYAFDY          | 6                | 2.03           | + +                  | -           | NA         |
| VH-35-Ab    | IGHV3-11*01 F                 | IGHJ5*01 F, or IGHJ5*02 F | IGHD4-23*01 ORF | AKDSQRRTVENWFDS        | 30               | 10.14          | +                    | +           | +          |
| VH-20-Ab    | IGHV3-23*04 F                 | IGHJ4*02 F                | IGHD6-13*01 F   | AKVGHSPFFDY            | 10               | 3.39           | +                    | -           | NA         |
| VH-27-Ab    | IGHV1-18*01 F                 | IGHJ5*02 F                | IGHD3-10*01 F   | ARAQWPGDWLDP           | 23               | 7.80           | +                    | -           | NA         |
| VH-5-Ab     | IGHV4-38-2*02 F               | IGHJ3*01 F, or IGHJ3*02 F | IGHD2-8*01 F    | ARDFYDIVLRLYAPEEAFDL   | 19               | 6.42           | +                    | -           | NA         |
| VH-25-Ab    | IGHV3-30-3*01 F               | IGHJ3*01 F                | IGHD3-10*01 F   | ARDQEERSPLVRGIFNDAFDV  | 30               | 10.14          | + + +                | -           | NA         |
| VH-2-Ab     | IGHV1-69*01 F, or IGHV1-69D*0 | IGHJ5*02 F                | IGHD6-13*01 F   | ARDSGSWFKFDP           | 27               | 9.12           | +                    | -           | NA         |
| VH-59-Ab    | IGHV1-3*01 F                  | IGHJ3*02 F                | IGHD2-15*01 F   | ARDVDPGATPRAFDI        | 4                | 1.35           | +                    | -           | NA         |
| VH-48-Ab    | IGHV3-21*01 F                 | IGHJ4*02 F                | IGHD4-17*01 F   | AREGRRRLRGDHDDEFDF     | 23               | 7.77           | + +                  | -           | NA         |
| VH-152-Ab   | IGHV4-39*01 F                 | IGHJ4*02 F                | IGHD1-26*01 F   | AREWREWELDEFDHDH       | 15               | 5.05           | +                    | + +         | +          |
| VH-30-Ab    | IGHV1-69*01 F, or IGHV1-69*11 | IGHJ1*01 F                | IGHD1-1*01 F    | ARFDQMDRLTTRDFQGG      | 15               | 5.10           | +                    | -           | NA         |
| VH-218-Ab   | IGHV1-8*01 F                  | IGHJ4*02 F                | IGHD3-3*01 F    | ARGRVDDFSSGCSGF        | 17               | 5.74           | +                    | -           | NA         |
| VH-79-Ab    | IGHV1-46*01 F, or IGHV1-46*03 | IGHJ3*02 F                | IGHD1-1*01 F    | ARHQGRDAFDI            | 10               | 3.40           | + +                  | -           | NA         |
| VH-51-Ab    | IGHV6-1*01 F                  | IGHJ6*02 F                | IGHD3-10*01 F   | ARMRITMVREVIITYGMDV    | 22               | 7.26           | +                    | +           | + + + +    |
| VH-24-Ab    | IGHV3-30*04 F, or IGHV3-30*3* | IGHJ5*02 F                | IGHD6-6*01 F    | ARPSTIAAGNWFDP         | 10               | 3.40           | +                    | -           | NA         |
| VH-36-Ab    | IGHV1-69*12 F                 | IGHJ4*02 F                | IGHD6-19*01 F   | ARQAVTGSLDY            | 14               | 4.76           | +                    | -           | NA         |
| VH-9-Ab     | IGHV4-61*03 F                 | IGHJ4*02 F                | IGHD2-15*01 F   | ARSGRNCRCGGTCHSAFDY    | 27               | 9.28           | + +                  | +           | +          |
| VH-49-Ab    | IGHV1-46*01 F, or IGHV1-46*03 | IGHJ6*02 F                | IGHD2-15*01 F   | ARSIVVVAVTPDYYYGIDV    | 10               | 3.40           | +                    | -           | NA         |
| VH-91-Ab    | IGHV4-30-4*01 F               | IGHJ4*02 F                | IGHD3-22*01 F   | ARVGNRSLSAHEPFDY       | 20               | 6.71           | + +                  | -           | NA         |
| VH-74-Ab    | IGHV1-18*04 F                 | IGHJ2*01 F                | IGHD3-16*01 F   | ARVRTGDQRRRNYAMVPPYFDL | 25               | 8.47           | +                    | -           | NA         |
| VH-18-Ab    | IGHV1-69*01 F, or IGHV1-69D*0 | IGHJ6*02 F                | IGHD5-12*01 F   | ARVVDWLANQDYYYQGMDV    | 16               | 5.42           | +                    | -           | NA         |
| VH-64-Ab    | IGHV4-4*02 F                  | IGHJ4*02 F                | IGHD3-9*01 F    | ARVWYYDILTYGQRYGYFDY   | 7                | 2.37           | +                    | -           | NA         |
| VH-55-Ab    | IGHV3-30-3*01 F               | IGHJ4*02 F                | IGHD6-13*01 F   | ASCWVSYTSNWHG DYLDY    | 11               | 3.75           | +                    | -           | NA         |
| VH-26-Ab    | IGHV1-18*04 F                 | IGHJ4*02 F                | IGHD3-22*01 F   | ASPTLWESSGFYAQYFFDD    | 18               | 6.21           | +                    | -           | NA         |
| VH-77-Ab    | IGHV4-39*01 F                 | IGHJ4*02 F                | IGHD6-13*01 F   | ASVPIPGYSSSPAASFDY     | 5                | 1.69           | + +                  | -           | NA         |
| VH-7-Ab     | IGHV4-39*01 F                 | IGHJ1*01 F                | IGHD4-23*01 ORF | CYGGNPWD               | 11               | 3.79           | +                    | -           | NA         |
| VH-28-Ab    | IGHV4-39*01 F                 | IGHJ4*02 F                | IGHD3-22*01 F   | TGGHKALYYDSSGFYWGRIFNY | 16               | 5.50           | + +                  | -           | NA         |
| VH-164-Ab   | IGHV3-11*04 F                 | IGHJ3*01 F, or IGHJ3*02 F | IGHD3-22*01 F   | VRIISSSYLDGFNL         | 27               | 9.18           | +                    | -           | NA         |

-: OD405 < 0.15  
 +: OD405 > 0.3  
 ++: OD405 > 0.6  
 +++: OD405 > 0.9  
 ++++: OD405 > 1.2  
 +++++: OD405 > 2.5  
 NA: didn't detect

**Table S2.** Repertoire and reactivity of 31 mAbs from dsDNA+IgG+ B cells in one HIV+ subject displayed substantial reactivity to dsDNA antigens.

|                       | Plasma sample | Water control |
|-----------------------|---------------|---------------|
| Average Observed OUTs | 93            | 30            |
| Average Copy Numbers  | 30647         | 16908         |

| Phylum         | Class               | Order              | Family            | Genus            | Species                 | Average Copies        |                        | Average percentage in total OTU (%) |                  |              |        |       |        |
|----------------|---------------------|--------------------|-------------------|------------------|-------------------------|-----------------------|------------------------|-------------------------------------|------------------|--------------|--------|-------|--------|
|                |                     |                    |                   |                  |                         | Sample                | Water control          | Sample                              | Water control    |              |        |       |        |
| proteobacteria | alphaproteobacteria | sphingomonadales   | sphingomonadaceae | sphingomonas     | sphingomonas mali       | 66                    | 593                    | 0.216                               | 3.504            |              |        |       |        |
|                |                     |                    |                   |                  | sphingomonas spp.       | 159                   | 4                      | 0.519                               | 0.024            |              |        |       |        |
|                | betaproteobacteria  | burkholderiales    | comamonadaceae    | burkholderiaceae | ralstonia               | ralstonia insidiosa   | 15                     | 48                                  | 0.048            | 0.284        |        |       |        |
|                |                     |                    |                   |                  |                         | delftia               | delftia acidovorans    | 46                                  | 36               | 0.152        | 0.210  |       |        |
|                |                     |                    |                   |                  |                         |                       | delftia lacustris      | 20                                  | 26               | 0.066        | 0.154  |       |        |
|                |                     |                    |                   |                  |                         |                       | delftia sp.            | 570                                 | 908              | 1.859        | 5.367  |       |        |
|                |                     |                    |                   |                  |                         |                       | delftia spp.           | 74                                  | 52               | 0.240        | 0.305  |       |        |
|                |                     |                    |                   |                  |                         |                       | delftia tsuruhatensis  | 254                                 | 165              | 0.829        | 0.976  |       |        |
|                |                     |                    |                   |                  |                         | alicycliphilus        | alicycliphilus spp.    | 113                                 | 470              | 0.369        | 2.777  |       |        |
|                |                     |                    |                   |                  |                         | comamonas             | comamonas testosteroni | 20                                  | 53               | 0.064        | 0.313  |       |        |
|                |                     |                    |                   |                  |                         | diaphorobacter        | diaphorobacter sp.     | 4                                   | 21               | 0.012        | 0.121  |       |        |
|                |                     |                    |                   |                  |                         | hydrogenophaga        | hydrogenophaga spp.    | 1453                                | 3648             | 4.742        | 21.573 |       |        |
|                | hylemonella         | hylemonella spp.   | 47                | 172              | 0.154                   | 1.017                 |                        |                                     |                  |              |        |       |        |
|                | pelomonas           | pelomonas aquatica | 50                | 148              | 0.162                   | 0.872                 |                        |                                     |                  |              |        |       |        |
|                | gammaproteobacteria | pseudomonadales    | pseudomonadaceae  | pseudomonas      | pseudomonas amygdali    | 77                    | 194                    | 0.252                               | 1.147            |              |        |       |        |
|                |                     |                    |                   |                  | pseudomonas fluorescens | 11                    | 57                     | 0.036                               | 0.334            |              |        |       |        |
|                |                     |                    |                   |                  | pseudomonas gessardii   | 30                    | 135                    | 0.097                               | 0.795            |              |        |       |        |
|                |                     |                    |                   |                  | pseudomonas libanensis  | 9                     | 27                     | 0.028                               | 0.157            |              |        |       |        |
|                |                     |                    |                   |                  | pseudomonas lini        | 8                     | 11                     | 0.026                               | 0.062            |              |        |       |        |
|                |                     |                    |                   |                  | pseudomonas migulae     | 84                    | 132                    | 0.275                               | 0.778            |              |        |       |        |
|                |                     |                    |                   |                  | pseudomonas poae        | 273                   | 629                    | 0.891                               | 3.717            |              |        |       |        |
|                |                     |                    |                   |                  | pseudomonas putida      | 797                   | 1240                   | 2.599                               | 7.331            |              |        |       |        |
|                |                     |                    |                   |                  | pseudomonas rhodesiae   | 16                    | 45                     | 0.052                               | 0.263            |              |        |       |        |
|                |                     |                    |                   |                  | pseudomonas sp.         | 158                   | 496                    | 0.516                               | 2.931            |              |        |       |        |
|                |                     |                    |                   |                  | pseudomonas spp.        | 707                   | 807                    | 2.306                               | 4.770            |              |        |       |        |
|                |                     |                    |                   |                  | pseudomonas straminea   | 1                     | 14                     | 0.004                               | 0.083            |              |        |       |        |
|                |                     |                    |                   |                  | pseudomonas tolaasii    | 42                    | 3                      | 0.137                               | 0.018            |              |        |       |        |
|                |                     |                    |                   |                  | pseudomonas veronii     | 624                   | 1929                   | 2.038                               | 11.406           |              |        |       |        |
|                |                     |                    |                   |                  | stenotrophomonas        | stenotrophomonas spp. | 310                    | 377                                 | 1.010            | 2.230        |        |       |        |
|                |                     |                    |                   |                  | deinococcus_thermus     | deinococci            | thermales              | thermaceae                          | thermus          | thermus spp. | 67     | 214   | 0.219  |
| firmicutes     |                     |                    |                   |                  | bacilli                 | lactobacillales       | carnobacteriaceae      | atopostipes                         | thermus thiopara | 361          | 1262   | 1.179 | 7.461  |
|                |                     |                    |                   |                  |                         |                       |                        |                                     | atopostipes sp.  | 1285         | 3003   | 4.192 | 17.758 |

**Table S3.** The OUT in water control

## Supplementary Figures

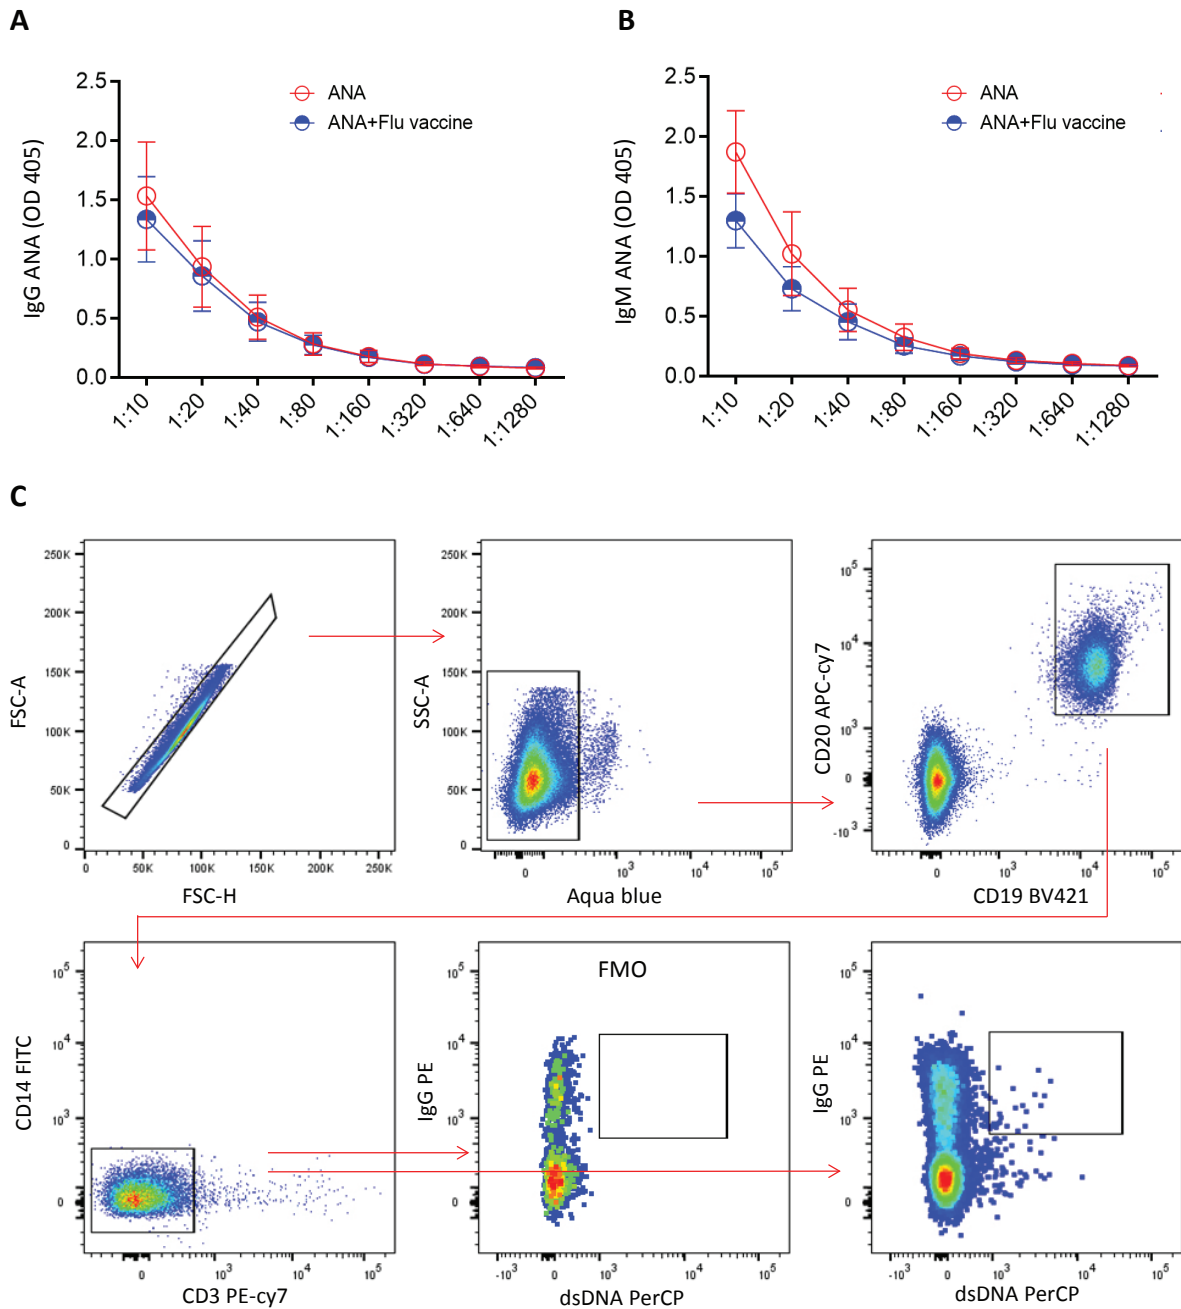

**Figure S1.** Cross reactivity of purified IgG (A) and IgM ANA (B) to influenza vaccine antigens by competitive ELISA. Polyclonal ANA was purified from plasmas of four high ANA HIV+ subjects on D14 post-vaccination. Purified ANA was tested its binding ability to nuclear antigens in the

presence or absence of influenza vaccine antigens. (C) Gating strategy for sorting single dsDNA-specific IgG<sup>+</sup> B cells.

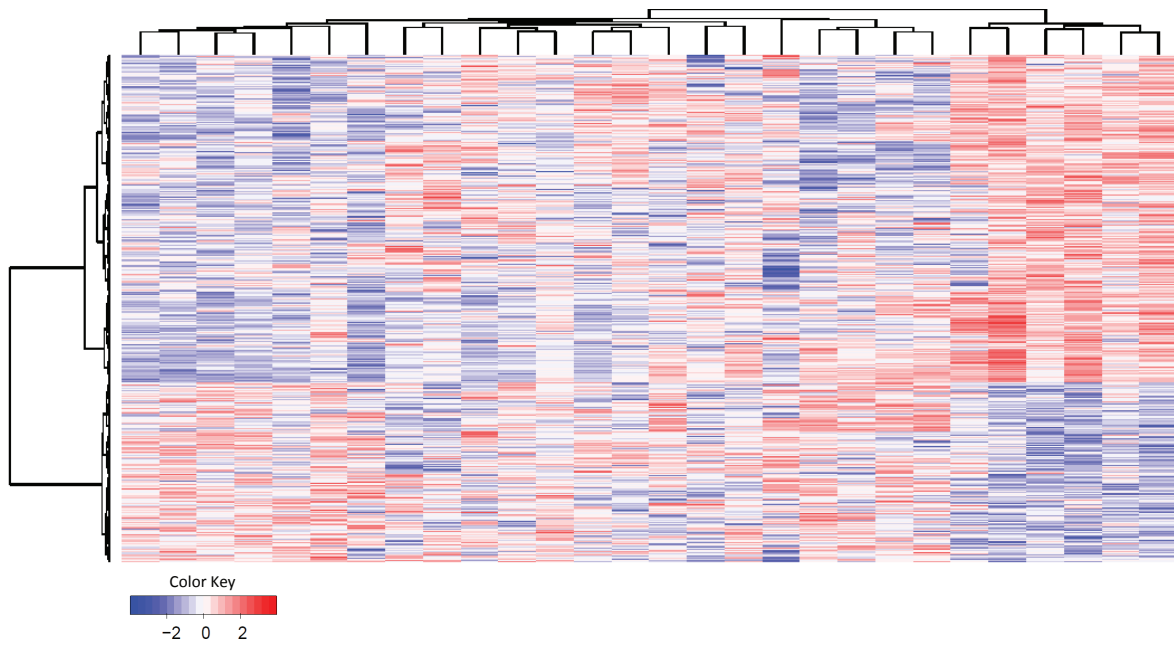

**Figure S2.** Variation in gene expression. Hierarchical-clustering of the 1000 most variable genes.

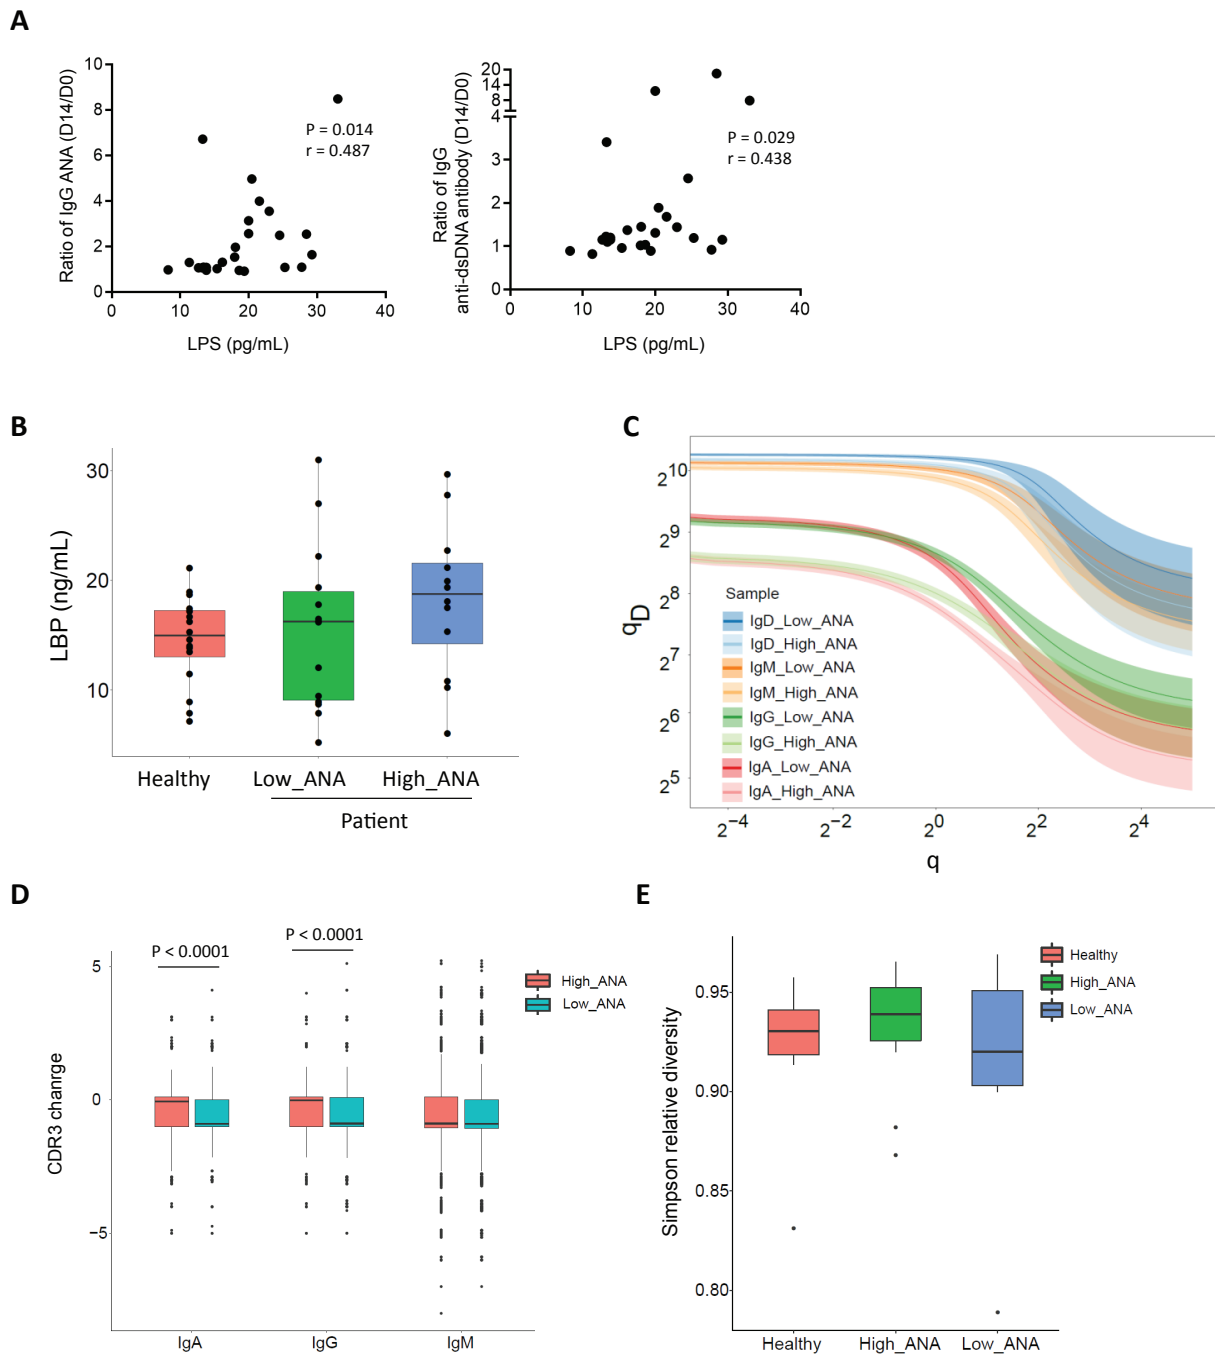

**Figure S3.** Systemic microbial translocation, B cell repertoire profiles, and plasma microbiome in autoantibody induction in HIV+ subjects. (A) Direct correlations between baseline plasma LPS level and IgG autoantibody induction by vaccination (D14/D0). (B) Plasma LBP level were

analyzed at baseline (D0) from the three study groups. (C) The clonal diversities of IgA, IgG, IgM, and IgD-positive B cells shown by the Hill diversity index ( $qD$ , y axis) within each HIV+ group. The median diversity score over all resampling realizations and 95% percentile were plotted as a line and a shaded background. All samples were randomly downsampled to 1000 sequences for each resampling realization to correct for variations in sequencing depth. (D) The median CDR3 charges of IgA, IgG, and IgM in the two HIV+ groups. (E) Gini Simpson diversity index ( $\alpha$ -diversity) to compare diversity of overall microbial community from the three study groups.



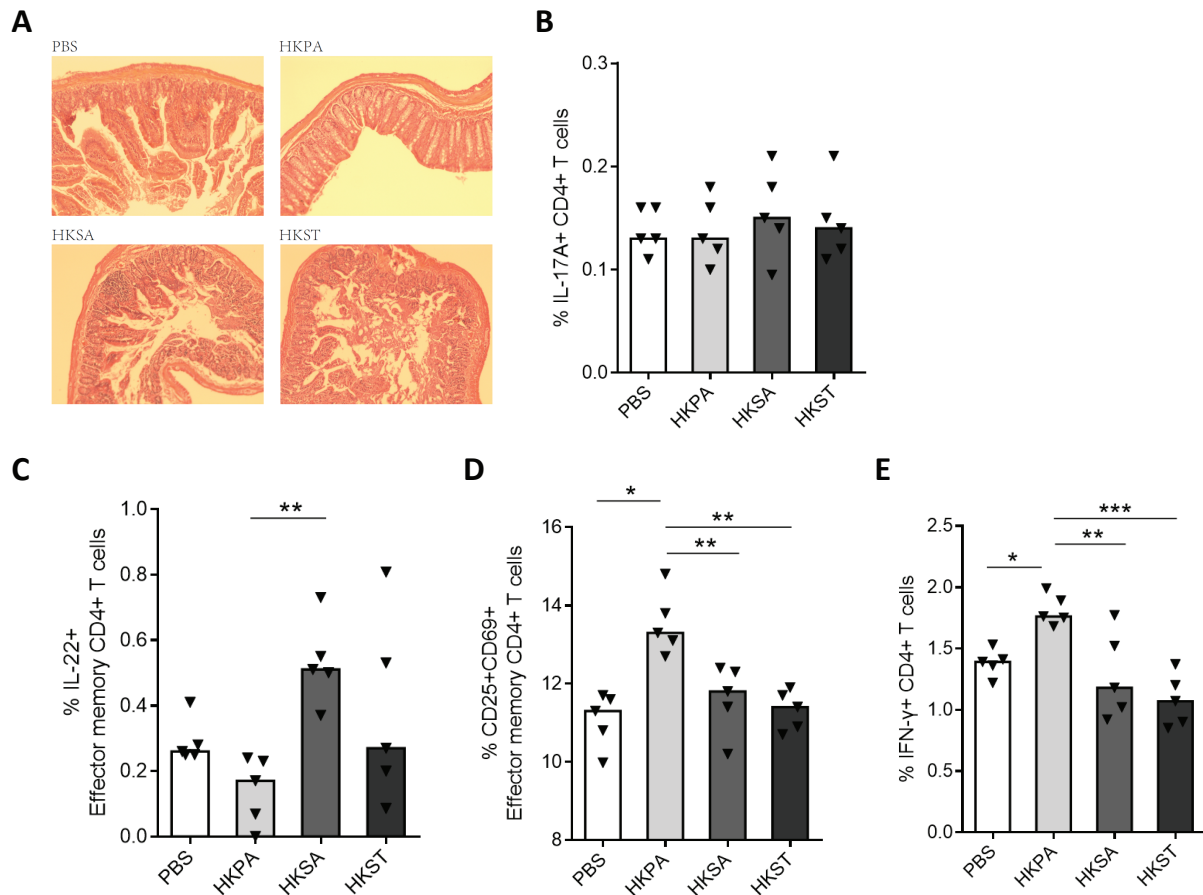

**Figure S4.** H&E-stained sections of small intestine and T cells response from spleen of C57BL/6 mice after treated with PBS, HKPA, HKSA, or HKST. (A) Disintegration of intestinal villi in HKST treated C57BL/6 mice. H&E-stained sections of small intestine after treatment. (B) Proportions of Th17 cells in the spleen showed no change when compared within four groups. (C) The frequency of IL-22+ memory ( $CD44^{hi}CD62^{lo}$ ) CD4+ T cells increased in the spleen of HKSA group compared to HKPA group. (D) The frequency of CD25+CD69+ memory CD4+ T cells increased in the spleen of HKPA group compared to other groups. (E) The frequency of IFN- $\gamma$  CD4+ T cells in the spleen of mice in all groups, IFN- $\gamma$  staining were performed after 4

hours *ex vivo* stimulation with PMA and ionomycin in the presence of Brefeldin A. One-way ANOVA test, \* $p < 0.05$ , \*\* $p < 0.01$ , \*\*\* $p < 0.001$ , \*\*\*\* $p < 0.0001$ .
